# Supplementary material for: The Lactobacillus Bile Salt Hydrolase Repertoire Reveals Niche-Specific Adaptation
Source: PubMed Central journal article supplement (PMC5976879; doi:10.1128/msphere.00140-18), 2018-05-30
Supplement: sph003182556sf1.pdf [file sph003182556sf1.pdf]

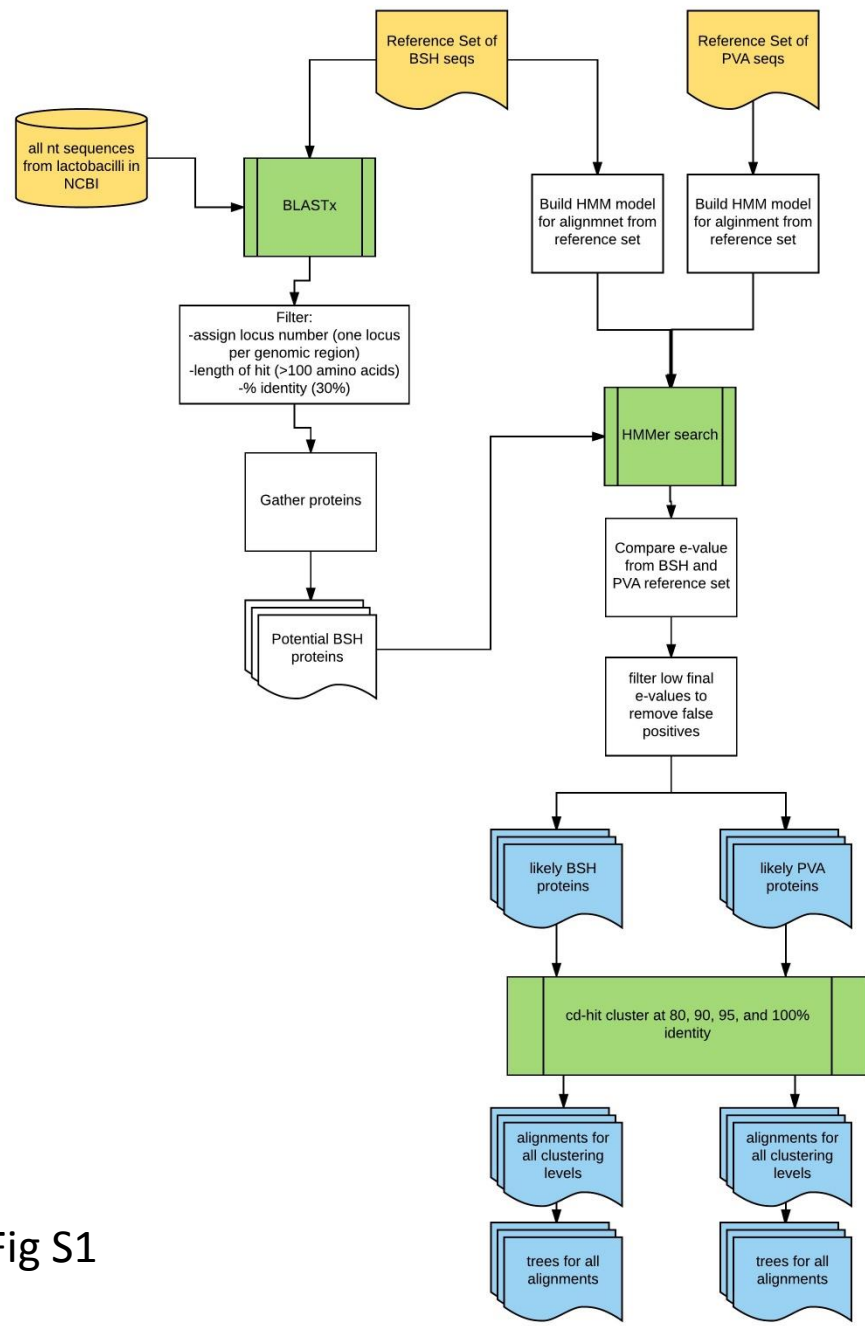

Fig S1
